# Supplementary material for: Ketogenic Diet and Physical Exercise on Managing Tarlov Cysts: A Case Report
Source: MDPI journal article supplement (doi:10.3390/reports5020012), 2022-03-29
Supplement: s1 [file s1]

**Table S1.** First mesocycle day 1.

| Exercise                                                                                                                     | Series | Extent        |
|------------------------------------------------------------------------------------------------------------------------------|--------|---------------|
| 10 'of warming up                                                                                                            |        |               |
| Passing the tennis ball under the plantar fascia                                                                             | 3      | 30'' per side |
| Passage of the proprioceptive ball under the plantar fascia                                                                  | 3      | 30'' per side |
| Static balance on the BOSU with open eyes                                                                                    | 3      | 1'            |
| Static balance on the BOSU with closed eyes                                                                                  | 3      | 1'            |
| Bend on the lower limbs with one foot on the BOSU                                                                            | 3      | 10 per side   |
| Passage of the proprioceptive ball under the palm of the hand                                                                | 3      | 30'' per side |
| Arm flexion with 1 'of isometry by pushing the swissball                                                                     | 3      | 10''          |
| Single push with 1 'of isometry and with the back of the hand and humerus extrarotated on the swissaball resting on the wall | 3      | 10 per side   |
| Isometric crunch                                                                                                             | 3      | 20''          |
| Isometric plank with support on the hands                                                                                    | 3      | 20''          |
| 10 'of stratching and joint mobility                                                                                         |        |               |

**Table S2.** First mesocycle day 2.

| Exercise                                                        | Series | Extent      |
|-----------------------------------------------------------------|--------|-------------|
| 10 'of warming up                                               |        |             |
| Partial squat with sitting on the bench                         | 3      | 10          |
| Isometric squat leaning against the wall with knee bent at 90 ° | 3      | 20''        |
| Single step up on rise (double step)                            | 3      | 10 per side |
| Floor buttocks bridge                                           | 3      | 10          |
| Lat machine                                                     | 3      | 10          |
| Vertical traction                                               | 3      | 10          |
| Lateral raises                                                  | 3      | 10          |
| Supine curl with dumbbells                                      | 3      | 10          |
| French press with dumbbells                                     | 3      | 10          |
| Isometric crunch                                                | 3      | 20''        |
| Isometric plank with support on the hands                       | 3      | 20''        |
| 10 'of stratching and joint mobility                            |        |             |

**Table S3.** Second mesocycle day 1.

| Exercise                                                    | Series | Extent        |
|-------------------------------------------------------------|--------|---------------|
| 10' of warming up                                           |        |               |
| Passage of the proprioceptive ball under the plantar fascia | 3      | 30'' per side |
| Static balance on the BOSU with eyes closed                 | 3      | 1'            |
| Dynamic and monopodalic ascent and descent on the BOSU      | 3      | 30'' per side |
| Partial lunge with one foot on the BOSU                     | 3      | 10 per side   |

|                                                                        |   |            |
|------------------------------------------------------------------------|---|------------|
| Single step up on rise (double step) and front descent                 | 3 | 8 per side |
| Arm flexion with 1 'of isometry by pressing the RING                   | 3 | 10         |
| Adduction with 1 'of isometry by pressing the RING behind the buttocks | 3 | 10         |
| Launch of the swissball with subject sitting on the BOSU               | 3 | 1'         |
| Crunch                                                                 | 3 | 20''       |
| Quadrupedal hyperextension                                             | 3 | 20''       |
| 10' of stratching and joint mobility                                   |   |            |

**Table S4.** Second mesocycle day 2.

| Exercise                       | Series | Extent |
|--------------------------------|--------|--------|
| 10' of warming up              |        |        |
| Super set:                     |        |        |
| -Squat up to parallel          | 4      | 12     |
| -Rowing with EZ barbell        | 4      | 12     |
| Super set:                     |        |        |
| -Squat in side walk            | 4      | 30''   |
| -Vertical traction             | 4      | 12     |
| Super set:                     |        |        |
| -Leg extension                 | 4      | 12     |
| -Supine lat machine            | 4      | 12     |
| Super set:                     |        |        |
| -Step up                       | 3      | 10     |
| -Lateral raise                 |        |        |
| Crunch                         | 3      | 20''   |
| Quadrupedal hyperextension     | 3      | 20''   |
| 10' of stratching and mobility |        |        |
