# Supplementary material for: Ketogenic Diet and Physical Exercise on Managing Tarlov Cysts: A Case Report
Source: MDPI journal article supplement (doi:10.3390/reports5020012), 2022-03-29
Supplement: s1 [file s1]

Archive with 1 entries (1 files):
- reports-1591741-supplementary.pdf
